# Supplementary material
Source: MDPI journal article supplement (https://www.mdpi.com/2073-4433/15/4/502)
Supplement: s1 [file s1]

Supplementary Materials

# Influence of Vertical Load, Inflation Pressure, and Driving Speed on the Emission of Tire–Road Particulate Matter and its Size Distribution

Stefan Schläfle, Meng Zhang, Hans-Joachim Unrau and Frank Gauterin

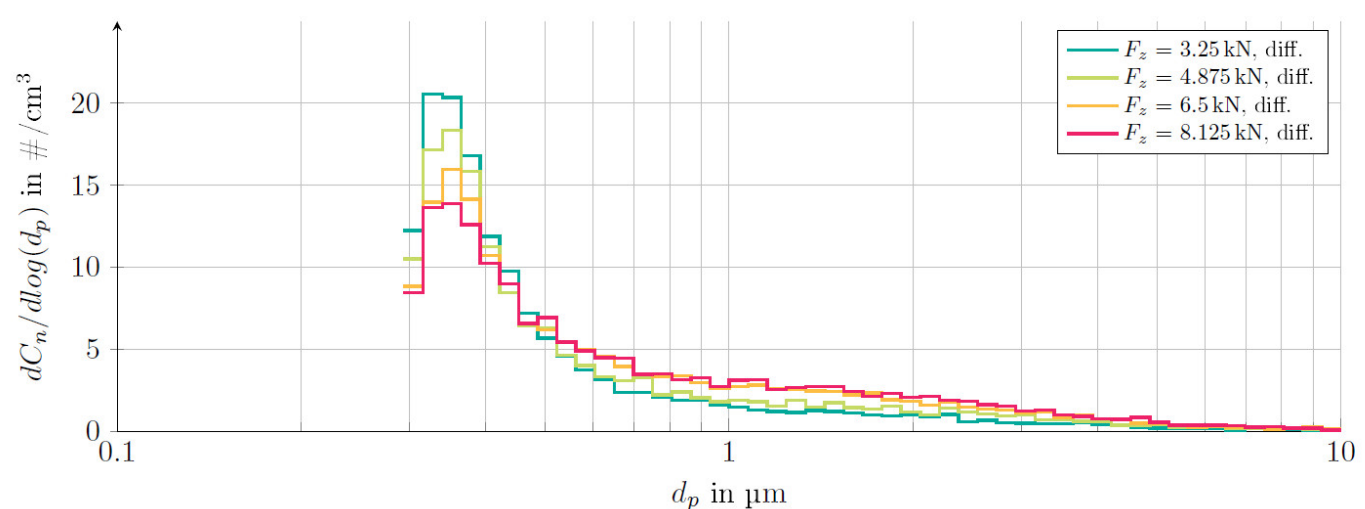

(a) Free rolling

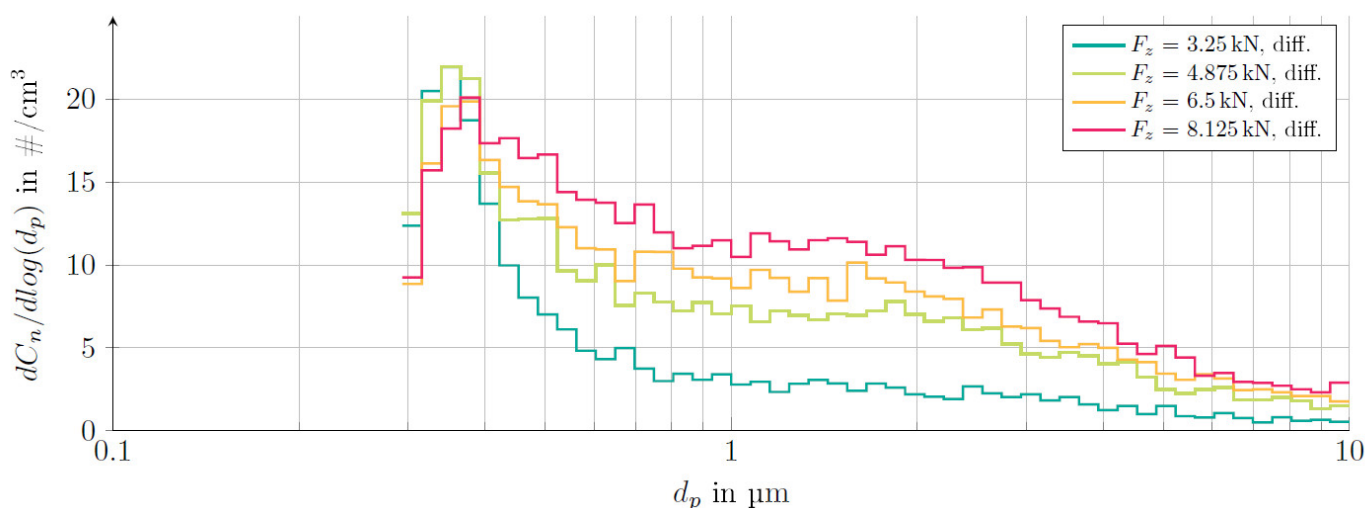

(b) Adhesion utilization  $F_x/F_z = 0.62$

**Figure S1.** Influence of vertical load on the particle number distribution at different load conditions in non-normalized view.

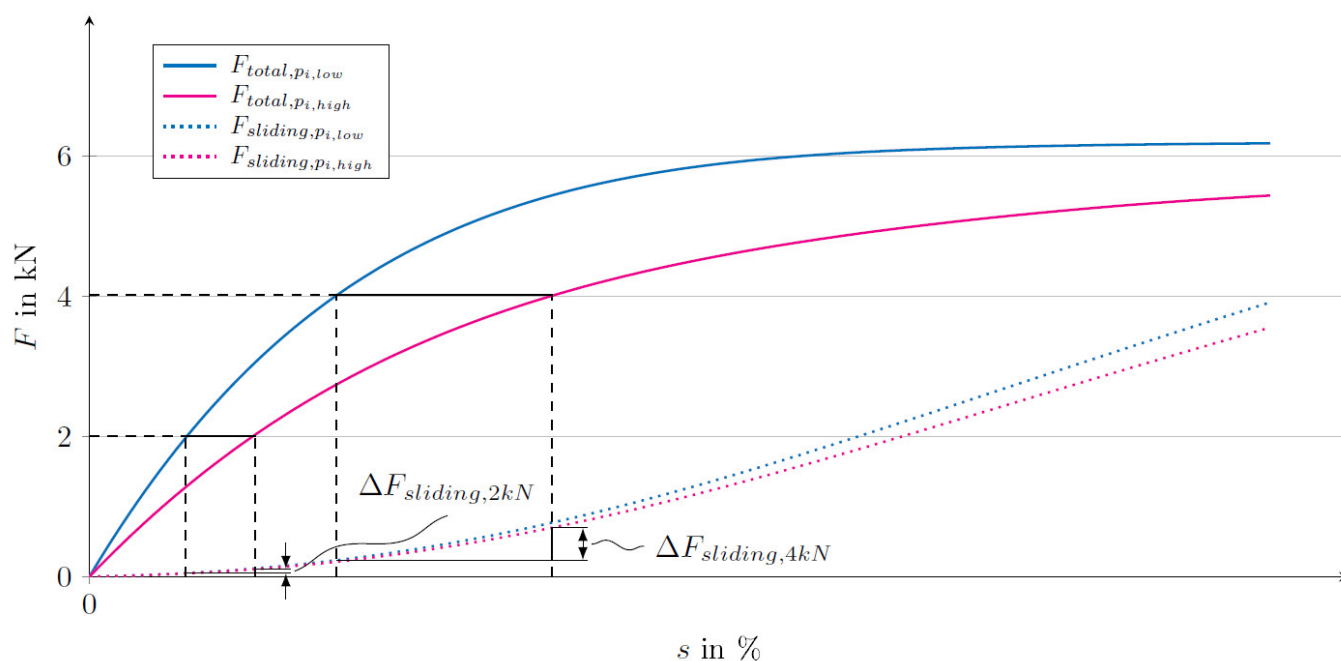

**Figure S2.** Total tire force and proportion of force due to gliding slip as a function of slip for two different tire inflation pressures.

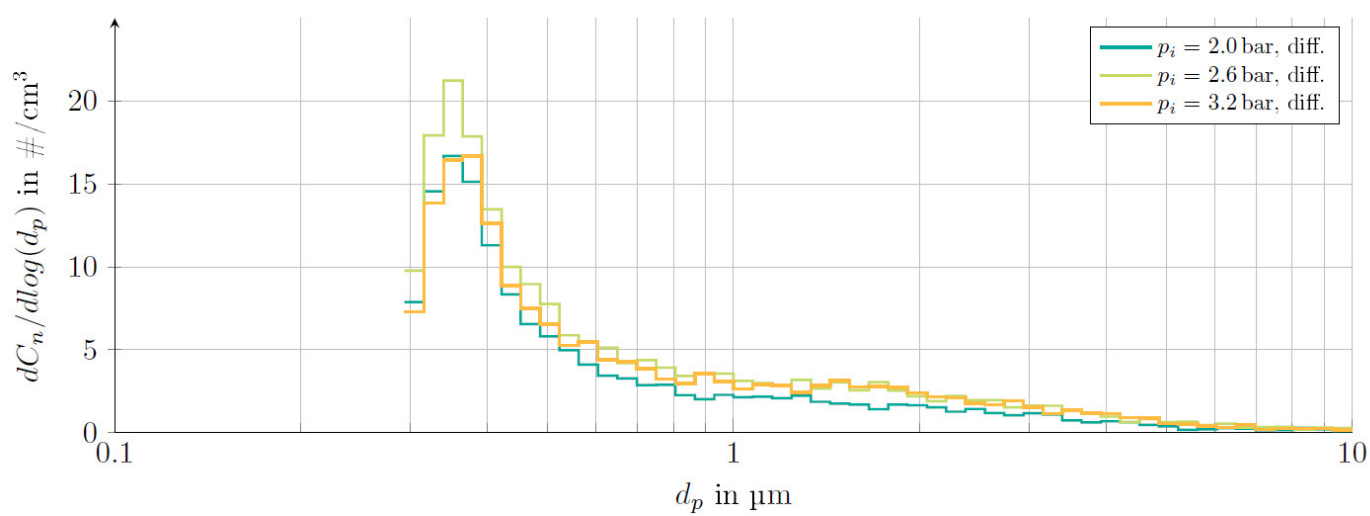

(a) Free rolling

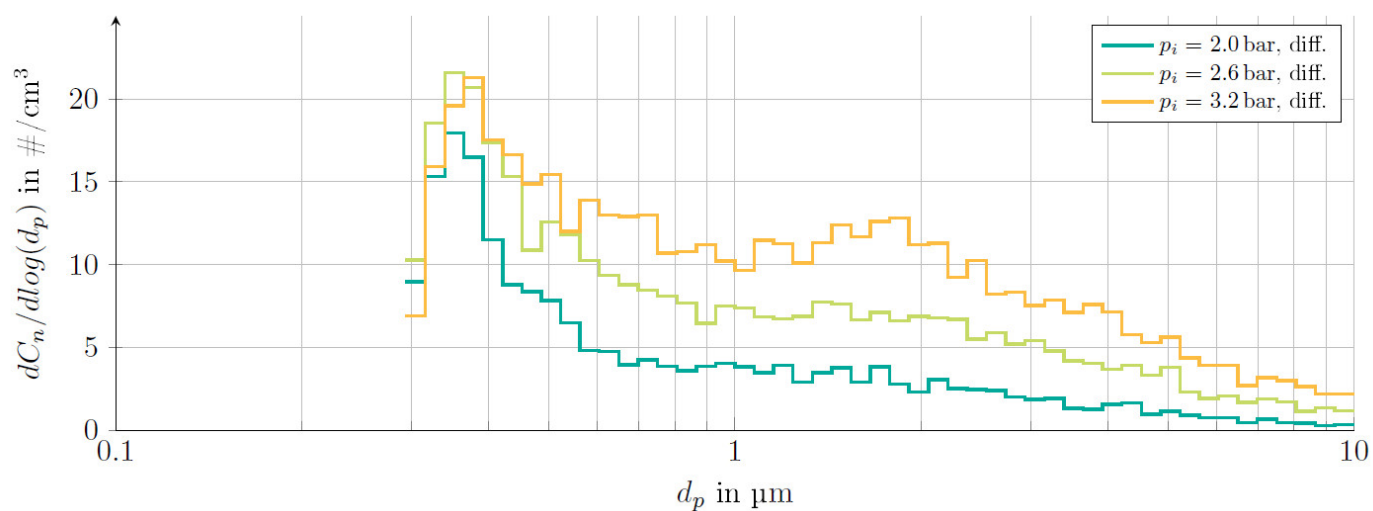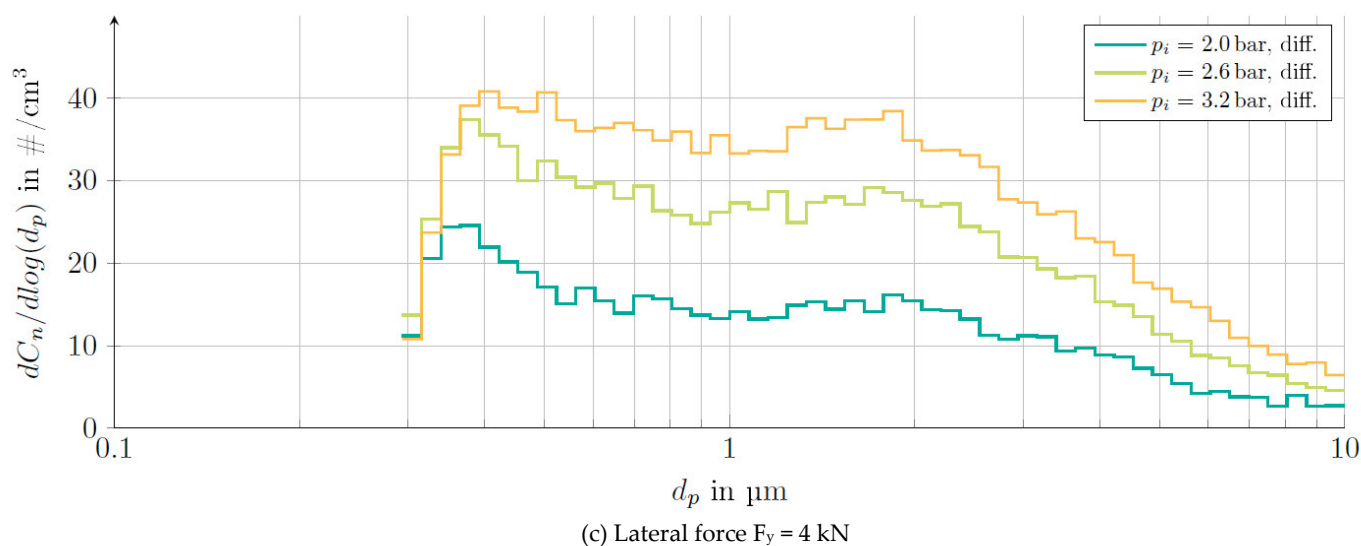

**Figure S3.** Influence of tire inflation pressure on the particle number distribution at different load conditions in non-normalized view.

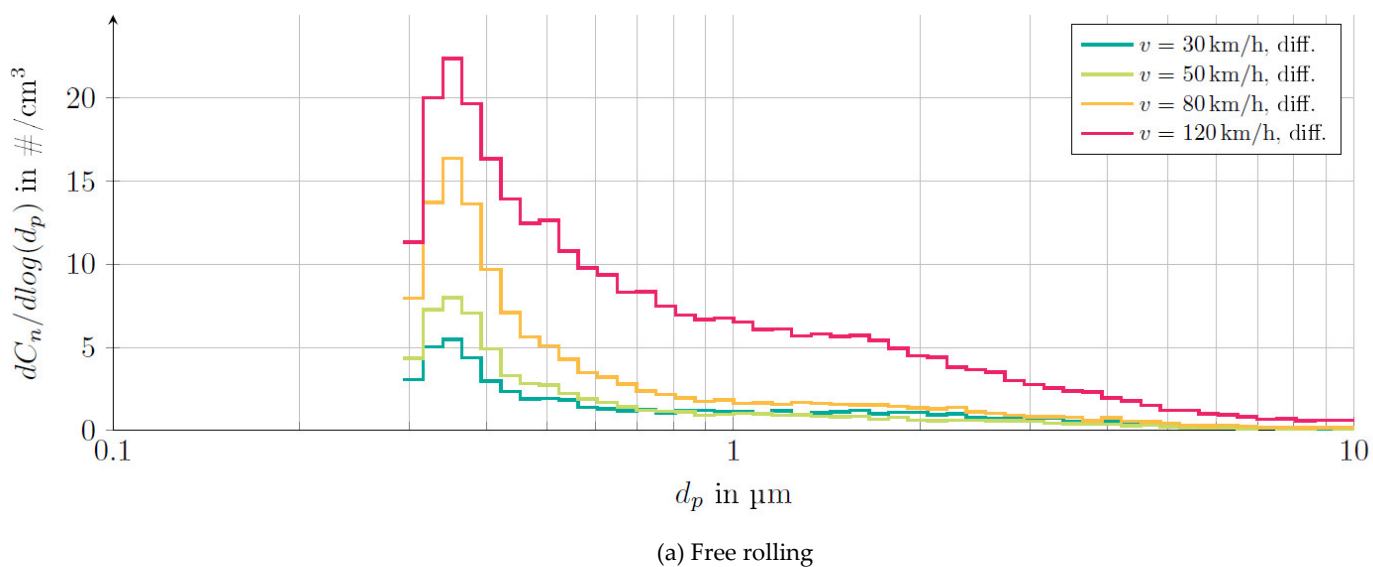

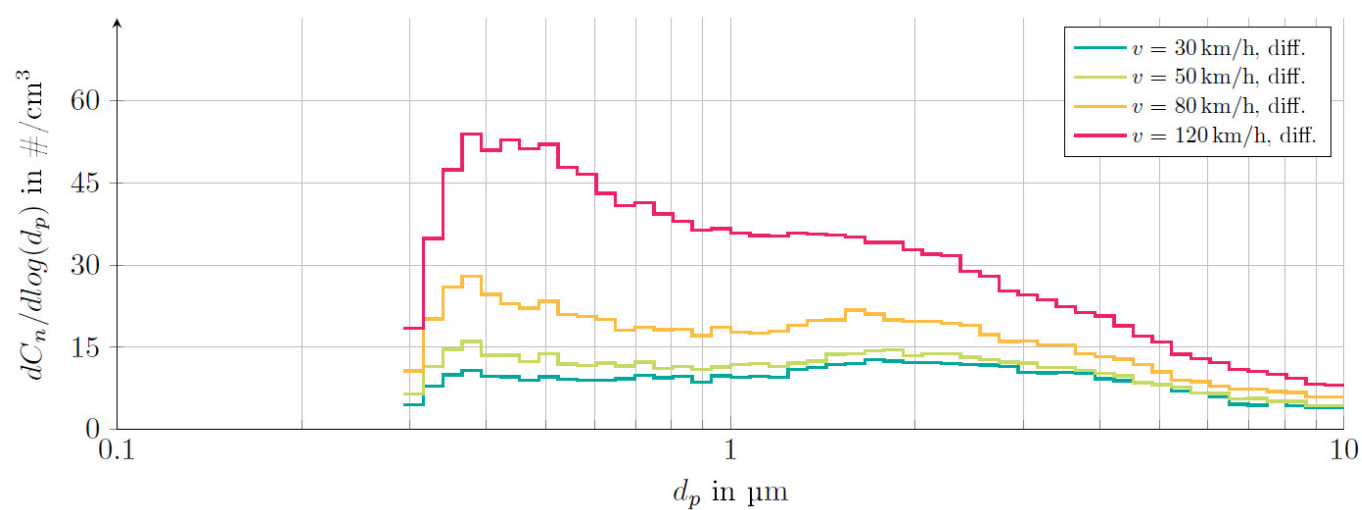

(b) Lateral force  $F_y = 4$  kN

**Figure S4.** Influence of driving speed on the particle number distribution at different load conditions in non-normalized view.
